# Supplementary figures and images for: Theoretical prediction of corrosion inhibition by ionic liquid derivatives: a DFT and molecular dynamics approach
Source: Royal Society of Chemistry journal article supplement (doi:10.1039/d5ra01097g), 2025-01-01

**[5E5O-Imid] Br @ Fe110 [6E6O-Imid] Br @ Fe110 [4AB-Imid] Br @ Fe110**

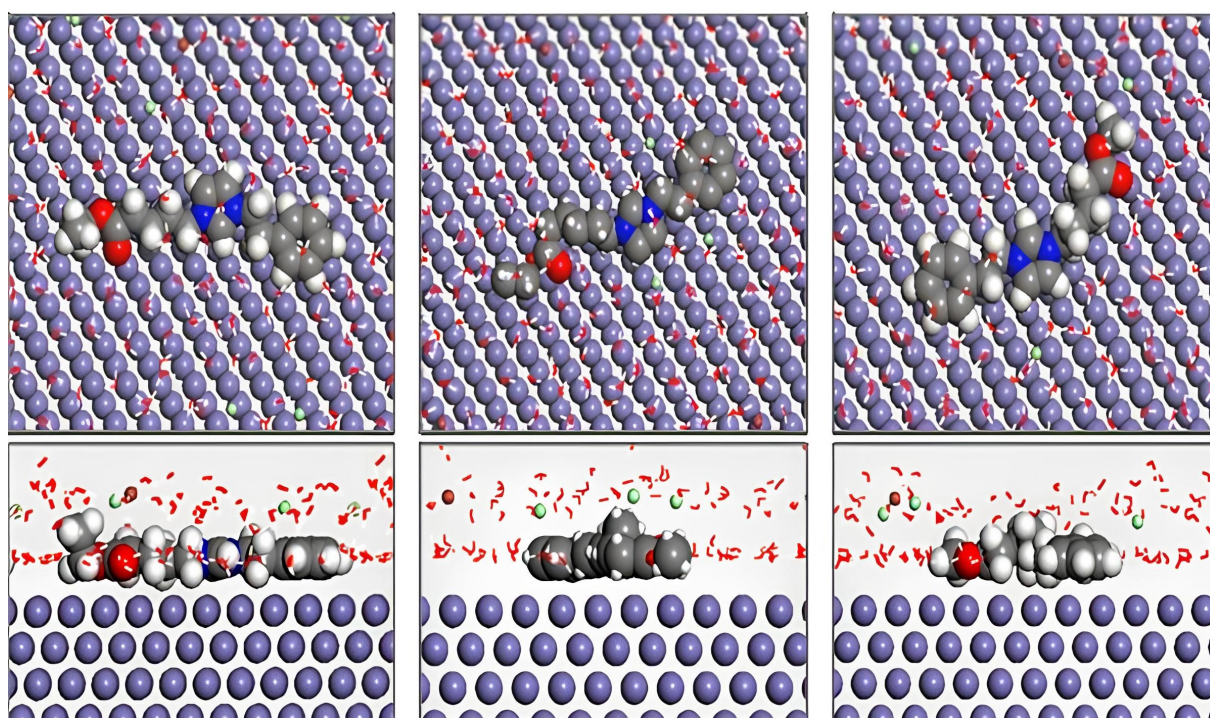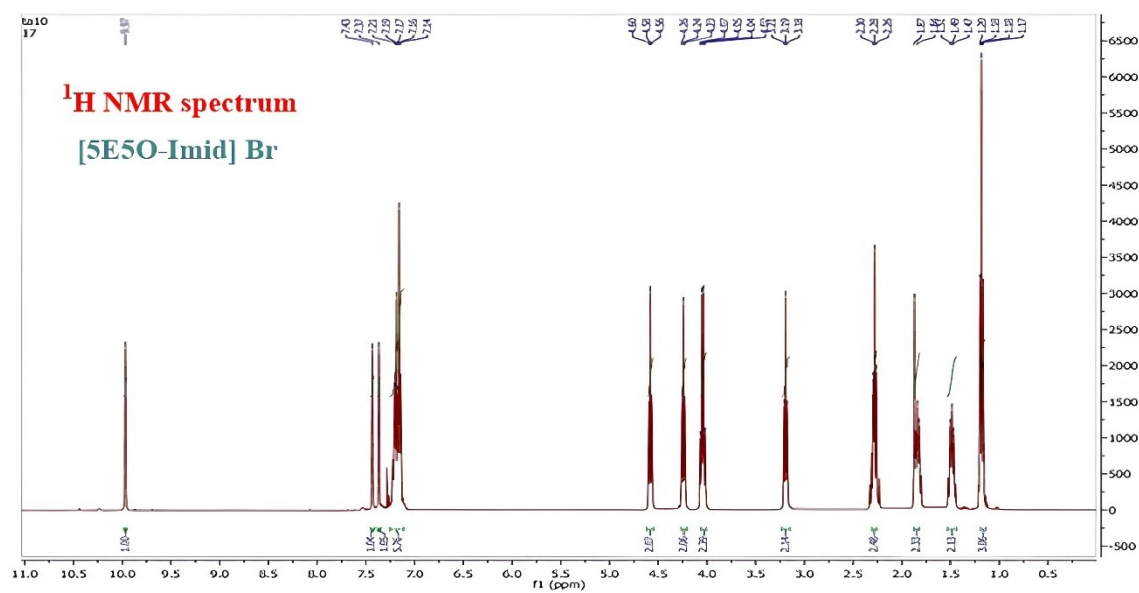

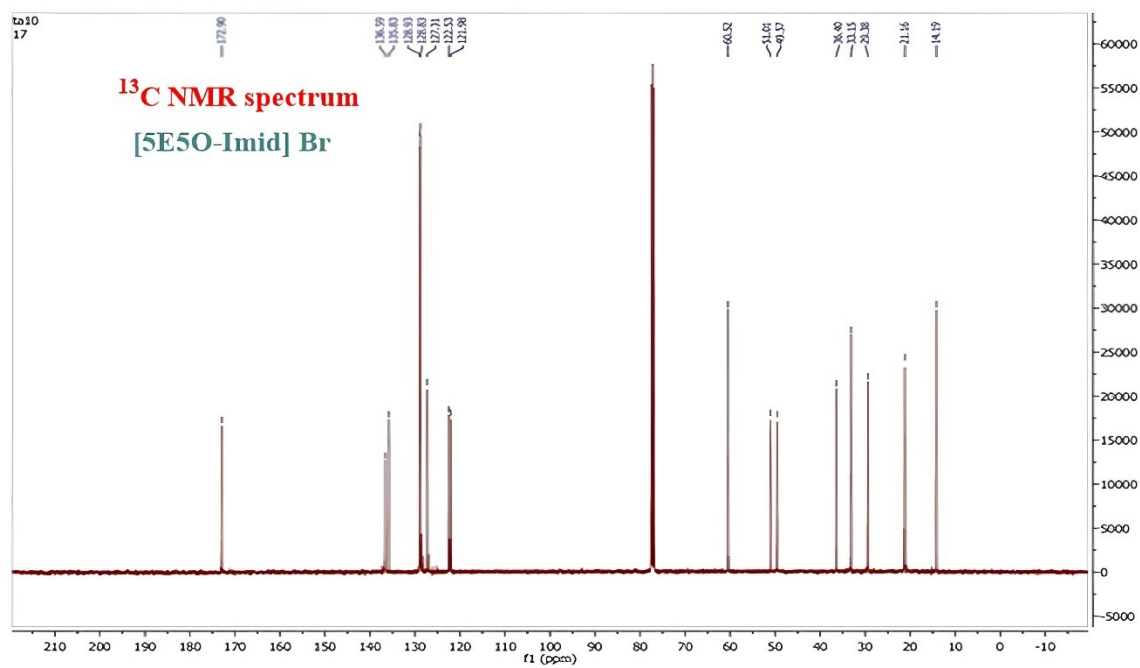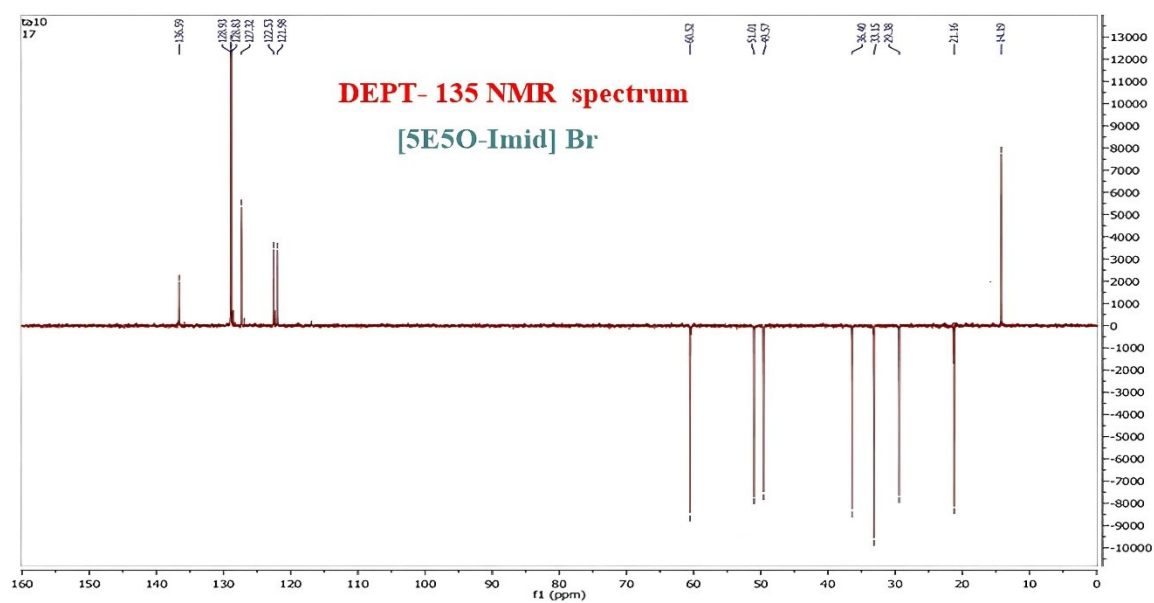

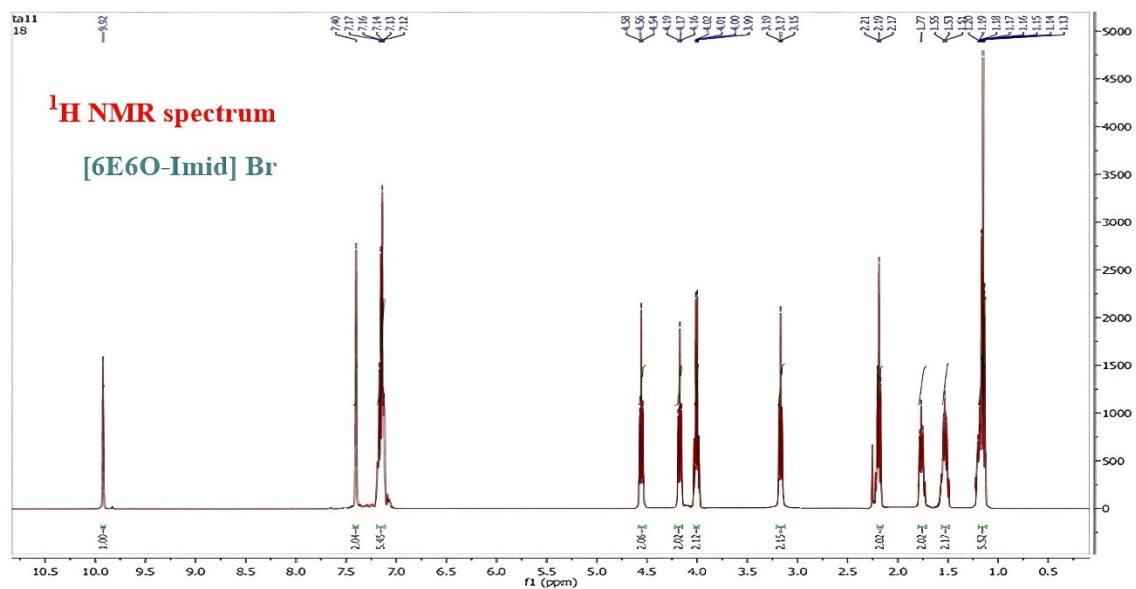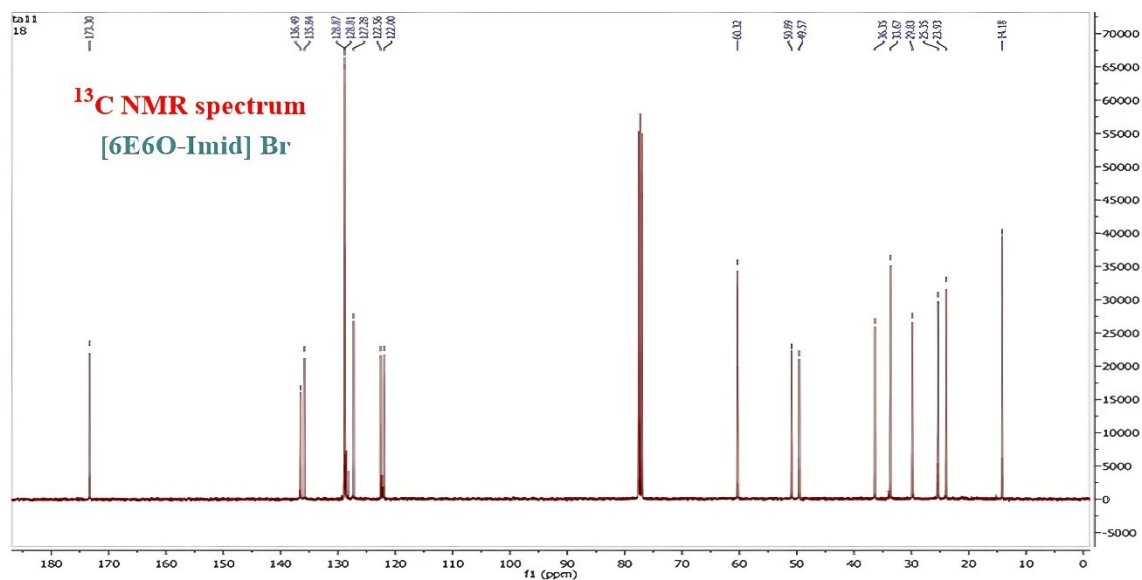

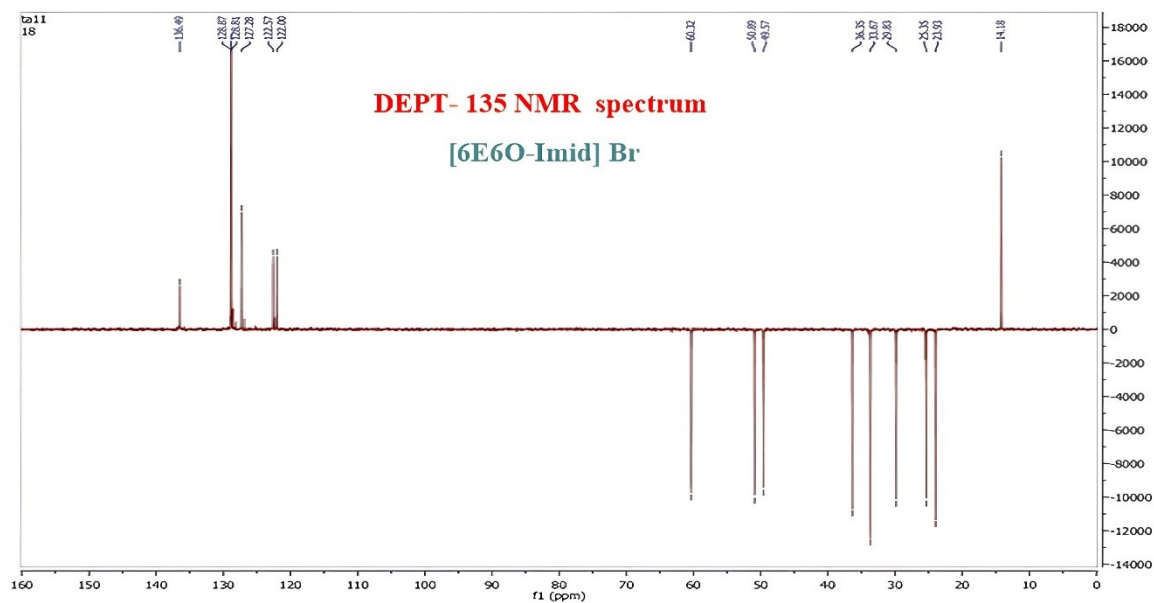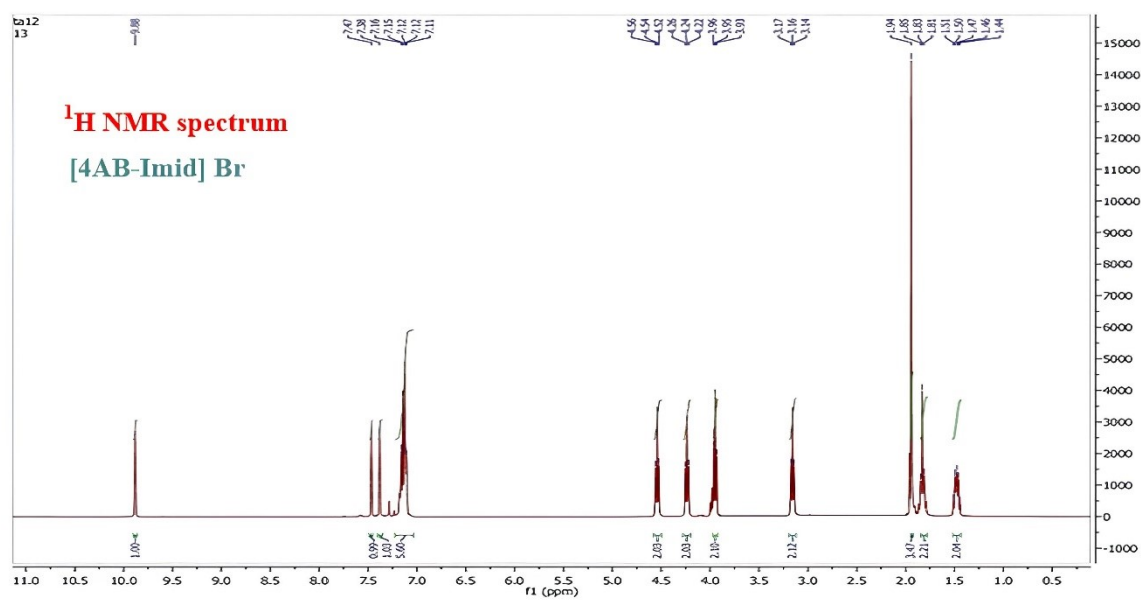

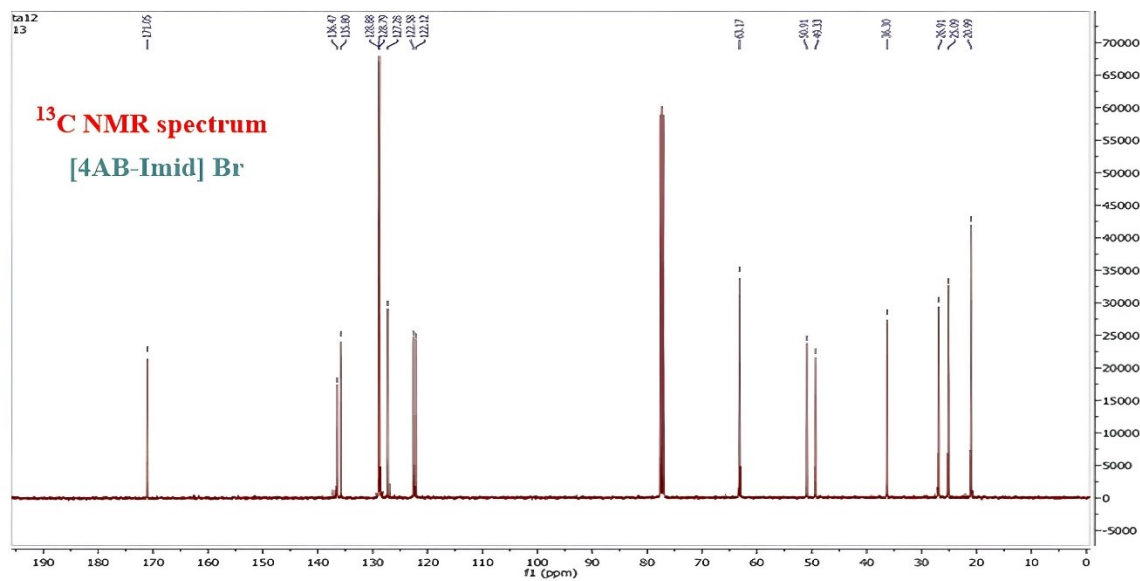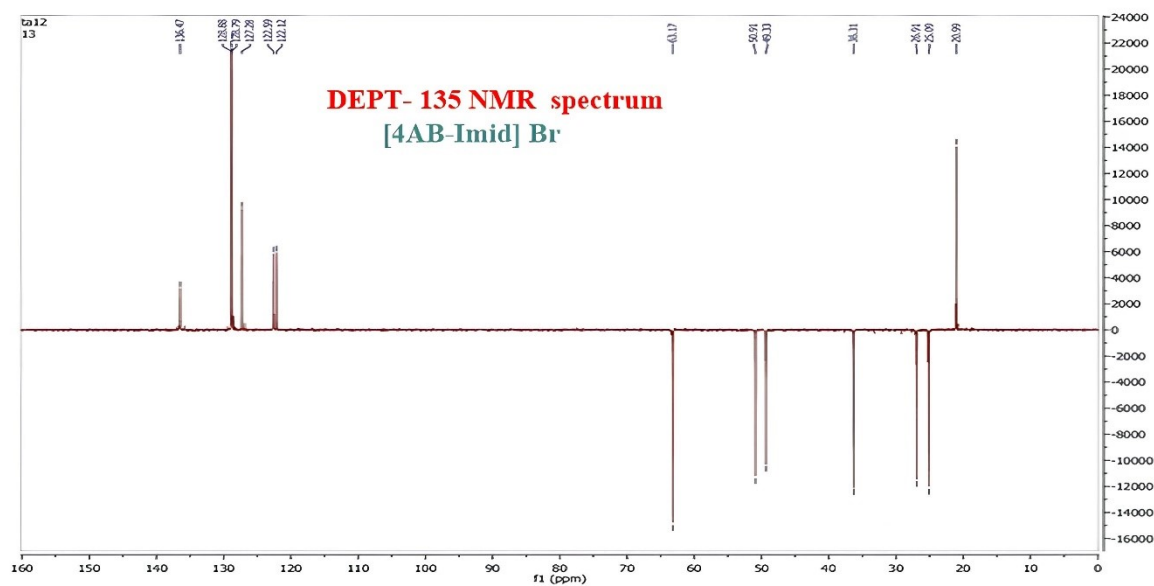

Supplement: d5ra01097g1.pdf [file d5ra01097g1.pdf]
